# Supplementary material for: MicroRNA dysregulation and esophageal cancer development depend on the extent of zinc dietary deficiency
Source: PubMed Central journal article supplement (PMC4905434; doi:10.18632/oncotarget.7561), 2016-02-21
Supplement: oncotarget-07-10723-s001.pdf [file oncotarget-07-10723-s001.pdf]

## MicroRNA dysregulation and esophageal cancer development depend on the extent of zinc dietary deficiency

### Supplementary Material

**Supplementary Table 1.** Esophageal microRNA expression profiling in Zn-modulated rats fed diets containing 3, 6, 12, or 60 mg Zn/kg using the nanoString™ nCounter rat miRNA expression assay kit (n=6 rats/group) (cut off:  $P \leq 0.05$ , fold-change  $\geq 1.3$ ) ZD3 = marked ZD (zinc-deficiency), 3 mg Zn/kg diet; ZD6 = moderate ZD, 6 mg Zn/kg diet; ZD12 = mild ZD, 12 mg Zn/kg diet; ZS = Zn-sufficiency, 60 mg Zn/kg

\*\* denotes miRNAs that are similarly up- or downregulated in human esophageal squamous cell carcinoma

| ZD3 vs ZS<br>(22-weeks of dietary regimen) |             |         |
|--------------------------------------------|-------------|---------|
| miRNA name                                 | Fold-change | P-Value |
| <b>24 Up-regulated</b>                     |             |         |
| **miR-31                                   | 4.90        | 0.0068  |
| **miR-223                                  | 4.21        | 0.0000  |
| **miR-21                                   | 4.17        | 0.0011  |
| **miR-146b                                 | 3.93        | 0.0000  |
| **miR-146a                                 | 3.73        | 0.0000  |
| miR-342-3p                                 | 2.94        | 0.0001  |
| miR-150                                    | 2.12        | 0.0129  |
| miR-425                                    | 2.03        | 0.0005  |
| miR-17-5p                                  | 1.94        | 0.0063  |
| miR-128                                    | 1.91        | 0.0127  |
| miR-132                                    | 1.86        | 0.0262  |
| miR-126                                    | 1.78        | 0.0247  |
| miR-20a+miR-20b-5p                         | 1.76        | 0.0003  |
| miR-34a                                    | 1.69        | 0.0097  |
| miR-140                                    | 1.6         | 0.0359  |
| miR-10b                                    | 1.53        | 0.0010  |
| miR-3558-3p                                | 1.53        | 0.0178  |
| let-7i                                     | 1.52        | 0.0309  |
| miR-16                                     | 1.47        | 0.0239  |
| miR-199a-5p                                | 1.45        | 0.0143  |
| miR-674-5p                                 | 1.4         | 0.0083  |

| ZD6 vs ZS<br>(22-weeks of dietary regimen) |             |         |
|--------------------------------------------|-------------|---------|
| miRNA name                                 | Fold-change | P-Value |
| <b>18 Up-regulated</b>                     |             |         |
| **miR-146a                                 | 1.86        | 0.0003  |
| miR-342-3p                                 | 1.68        | 0.0037  |
| **miR-31                                   | 1.64        | 0.0267  |
| miR-140                                    | 1.6         | 0.0325  |
| **miR-146b                                 | 1.55        | 0.0362  |
| miR-3558-3p                                | 1.5         | 0.0271  |
| miR-150                                    | 1.47        | 0.0215  |
| miR-196b                                   | 1.47        | 0.0285  |
| miR-199a-5p                                | 1.47        | 0.0484  |
| miR-653                                    | 1.45        | 0.0427  |
| miR-295                                    | 1.44        | 0.0220  |
| miR-347                                    | 1.43        | 0.0015  |
| miR-741-3p                                 | 1.41        | 0.0476  |
| miR-98                                     | 1.38        | 0.0007  |
| **miR-27a                                  | 1.37        | 0.0440  |
| miR-29a                                    | 1.35        | 0.0175  |
| miR-181a                                   | 1.31        | 0.0110  |
| miR-30d                                    | 1.3         | 0.0254  |
| <b>15 Down-regulated</b>                   |             |         |
| miR-301a                                   | 0.46        | 0.0005  |
| miR-204                                    | 0.46        | 0.0052  |

| ZD12 vs ZS<br>(22-weeks of dietary regimen) |             |         |
|---------------------------------------------|-------------|---------|
| miRNA name                                  | Fold-change | P-Value |
| <b>11 Up-regulated</b>                      |             |         |
| miR-342-3p                                  | 1.83        | 0.0075  |
| **miR-146a                                  | 1.78        | 0.0015  |
| miR-3558-3p                                 | 1.65        | 0.0043  |
| miR-741-3p                                  | 1.61        | 0.0080  |
| miR-150                                     | 1.55        | 0.0017  |
| miR-26a                                     | 1.53        | 0.0223  |
| **miR-31                                    | 1.49        | 0.0232  |
| miR-363                                     | 1.42        | 0.0209  |
| miR-199a-5p                                 | 1.41        | 0.0196  |
| **miR-223                                   | 1.39        | 0.0173  |
| miR-324-5p                                  | 1.30        | 0.0374  |
| <b>23 Down-regulated</b>                    |             |         |
| miR-224                                     | 0.47        | 0.0244  |
| miR-3557-3p                                 | 0.54        | 0.0240  |
| miR-132                                     | 0.56        | 0.0271  |
| miR-204                                     | 0.59        | 0.0322  |
| miR-375                                     | 0.60        | 0.0485  |
| miR-3577                                    | 0.61        | 0.0356  |
| miR-23b                                     | 0.61        | 0.0001  |
| miR-203                                     | 0.62        | 0.0003  |
| miR-183                                     | 0.63        | 0.0069  |

|                          |             |        |
|--------------------------|-------------|--------|
| <b>miR-322</b>           | <b>1.36</b> | 0.0447 |
| <b>miR-93</b>            | <b>1.34</b> | 0.0049 |
| <b>miR-324-5p</b>        | <b>1.3</b>  | 0.0162 |
| <b>22 Down-regulated</b> |             |        |
| <b>miR-204</b>           | <b>0.09</b> | 0.0005 |
| <b>miR-1224</b>          | <b>0.21</b> | 0.0078 |
| <b>miR-375</b>           | <b>0.28</b> | 0.0031 |
| <b>miR-145</b>           | <b>0.36</b> | 0.0018 |
| <b>miR-224</b>           | <b>0.42</b> | 0.0053 |
| <b>miR-434</b>           | <b>0.49</b> | 0.0013 |
| <b>miR-205</b>           | <b>0.5</b>  | 0.0090 |
| <b>miR-328a</b>          | <b>0.56</b> | 0.0001 |
| <b>miR-200a</b>          | <b>0.56</b> | 0.0025 |
| <b>miR-143</b>           | <b>0.56</b> | 0.0136 |
| <b>miR-301a</b>          | <b>0.57</b> | 0.0203 |
| <b>miR-142-5p</b>        | <b>0.59</b> | 0.0150 |
| <b>miR-125b-5p</b>       | <b>0.61</b> | 0.0066 |
| <b>miR-365</b>           | <b>0.63</b> | 0.0095 |
| <b>miR-99a</b>           | <b>0.65</b> | 0.0331 |
| <b>miR-23b</b>           | <b>0.68</b> | 0.0015 |
| <b>miR-3580-5p</b>       | <b>0.7</b>  | 0.0323 |
| <b>miR-200c</b>          | <b>0.71</b> | 0.0027 |
| <b>miR-222</b>           | <b>0.73</b> | 0.0495 |
| <b>miR-3557-3p</b>       | <b>0.75</b> | 0.0457 |
| <b>miR-632</b>           | <b>0.75</b> | 0.0498 |
| <b>let-7b</b>            | <b>0.75</b> | 0.0160 |

|                   |             |        |
|-------------------|-------------|--------|
| <b>miR-1224</b>   | <b>0.47</b> | 0.0426 |
| <b>miR-132</b>    | <b>0.6</b>  | 0.0351 |
| <b>let-7e</b>     | <b>0.63</b> | 0.0096 |
| <b>miR-203</b>    | <b>0.64</b> | 0.0004 |
| <b>miR-221</b>    | <b>0.65</b> | 0.0007 |
| <b>miR-23b</b>    | <b>0.66</b> | 0.0001 |
| <b>miR-183</b>    | <b>0.66</b> | 0.0076 |
| <b>miR-200b</b>   | <b>0.67</b> | 0.0010 |
| <b>miR-878</b>    | <b>0.67</b> | 0.0254 |
| <b>miR-130a</b>   | <b>0.74</b> | 0.0021 |
| <b>miR-25</b>     | <b>0.74</b> | 0.0025 |
| <b>miR-19b</b>    | <b>0.75</b> | 0.0068 |
| <b>miR-300-3p</b> | <b>0.75</b> | 0.0279 |

|                    |             |        |
|--------------------|-------------|--------|
| <b>miR-92b</b>     | <b>0.64</b> | 0.0385 |
| <b>miR-485</b>     | <b>0.64</b> | 0.0165 |
| <b>miR-3557-5p</b> | <b>0.64</b> | 0.0360 |
| <b>miR-429</b>     | <b>0.65</b> | 0.0332 |
| <b>miR-301a</b>    | <b>0.66</b> | 0.0227 |
| <b>miR-200b</b>    | <b>0.67</b> | 0.0004 |
| <b>miR-335</b>     | <b>0.68</b> | 0.0314 |
| <b>miR-96</b>      | <b>0.70</b> | 0.0387 |
| <b>miR-221</b>     | <b>0.74</b> | 0.0081 |
| <b>miR-3563-5p</b> | <b>0.75</b> | 0.0283 |
| <b>let-7e</b>      | <b>0.75</b> | 0.0282 |
| <b>miR-25</b>      | <b>0.76</b> | 0.0000 |
| <b>miR-200c</b>    | <b>0.76</b> | 0.0030 |
| <b>miR-23a</b>     | <b>0.76</b> | 0.0002 |

**Supplementary Table 2.** Esophageal microRNA expression profiling of tumor-bearing esophagus from Zn-modulated rats treated with 4 low doses of *N*-nitrosomethylbenzylamine, using the nanoString™ nCounter rat miRNA expression assay kit (n=6 rats/group ) (cut off:  $P \leq 0.05$ , fold-change  $\geq 1.3$ )

T= tumor endpoint; ZD3 = marked ZD (zinc-deficiency), 3 mg Zn/kg diet; ZD6 = moderate ZD, 6 mg Zn/kg diet; ZD12 = mild ZD, 12 mg Zn/kg diet; ZS = Zn-sufficiency, 60 mg Zn/kg

\*\* denotes miRNAs that are similarly up- or downregulated in human esophageal squamous cell carcinoma

| ZD3T vs ZST<br>(Tumor endpoint) |             |         |
|---------------------------------|-------------|---------|
| miRNA name                      | Fold-change | P-Value |
| <b>42 Up-regulated</b>          |             |         |
| **miR-223                       | 3.59        | 0.0002  |
| **miR-21                        | 3.39        | 0.0003  |
| **miR-31                        | 3.36        | 0.0173  |
| **miR-146a                      | 3.07        | 0.0001  |
| **miR-146b                      | 2.54        | 0.0041  |
| miR-132                         | 2.43        | 0.0001  |
| miR-1949                        | 2.36        | 0.0116  |
| miR-425                         | 2.13        | 0.0004  |
| **miR-27a                       | 1.98        | 0.0136  |
| miR-632                         | 1.91        | 0.0157  |
| miR-429                         | 1.90        | 0.0014  |
| **miR-221                       | 1.89        | 0.0017  |
| miR-29a                         | 1.79        | 0.0015  |
| miR-342-3p                      | 1.72        | 0.0095  |
| **miR-27b                       | 1.72        | 0.0085  |
| **miR-194                       | 1.69        | 0.0423  |
| miR-96                          | 1.68        | 0.0145  |
| **miR-24                        | 1.67        | 0.0061  |
| let-7i                          | 1.66        | 0.0010  |
| **miR-203                       | 1.65        | 0.0063  |
| miR-20a+miR-20b-5p              | 1.65        | 0.0265  |
| **miR-183                       | 1.64        | 0.0083  |
| miR-17-5p                       | 1.61        | 0.0485  |
| miR-378                         | 1.60        | 0.0101  |
| **miR-130b                      | 1.59        | 0.0130  |
| miR-93                          | 1.59        | 0.0001  |
| miR-30a                         | 1.57        | 0.0192  |
| miR-340-3p                      | 1.57        | 0.0196  |

| ZD6T vs ZST<br>(Tumor endpoint) |             |         |
|---------------------------------|-------------|---------|
| miRNA name                      | Fold-change | P-Value |
| <b>23 Up-regulated</b>          |             |         |
| miR-3575                        | 2.59        | 0.0205  |
| **miR-223                       | 2.19        | 0.0111  |
| miR-375                         | 1.97        | 0.0387  |
| miR-17-2-3p                     | 1.84        | 0.0209  |
| miR-3596d                       | 1.78        | 0.0339  |
| miR-29a                         | 1.75        | 0.0043  |
| miR-30c                         | 1.74        | 0.0140  |
| miR-504                         | 1.70        | 0.0012  |
| miR-345-5p                      | 1.69        | 0.0126  |
| miR-7a                          | 1.65        | 0.0119  |
| **miR-31                        | 1.62        | 0.0393  |
| miR-32                          | 1.59        | 0.0130  |
| miR-411                         | 1.59        | 0.0108  |
| miR-410                         | 1.58        | 0.0436  |
| miR-98                          | 1.55        | 0.0460  |
| **miR-27b                       | 1.54        | 0.0276  |
| let-7i                          | 1.50        | 0.0055  |
| miR-3590-3p                     | 1.49        | 0.0362  |
| miR-188                         | 1.46        | 0.0120  |
| let-7a                          | 1.46        | 0.0374  |
| miR-543                         | 1.44        | 0.0394  |
| miR-300-3p                      | 1.35        | 0.0336  |
| miR-200b                        | 1.30        | 0.0334  |

| ZD12T vs ZST<br>(Tumor endpoint) |             |         |
|----------------------------------|-------------|---------|
| miRNA name                       | Fold-change | P-Value |
| <b>17 Up-regulated</b>           |             |         |
| **miR-223                        | 2.85        | 0.0496  |
| miR-3575                         | 2.47        | 0.0038  |
| miR-1949                         | 2.41        | 0.0025  |
| miR-7a                           | 2.10        | 0.0070  |
| miR-98                           | 1.89        | 0.0005  |
| miR-425                          | 1.89        | 0.0168  |
| miR-741-3p                       | 1.86        | 0.0418  |
| miR-26a                          | 1.84        | 0.0087  |
| miR-671                          | 1.80        | 0.0381  |
| **miR-31                         | 1.71        | 0.0468  |
| miR-3596d                        | 1.63        | 0.0432  |
| miR-543                          | 1.59        | 0.0049  |
| miR-185                          | 1.52        | 0.0467  |
| let-7i                           | 1.46        | 0.0279  |
| miR-107                          | 1.45        | 0.0040  |
| miR-361                          | 1.37        | 0.0126  |
| miR-675                          | 1.37        | 0.0499  |
| <b>1 Down-regulated</b>          |             |         |
| miR-205                          | 0.50        | 0.0215  |

---

|                         |      |        |
|-------------------------|------|--------|
| miR-107                 | 1.56 | 0.0199 |
| miR-543                 | 1.56 | 0.0471 |
| miR-300-3p              | 1.53 | 0.0031 |
| miR-148b-3p             | 1.52 | 0.0004 |
| miR-30c                 | 1.46 | 0.0292 |
| let-7f                  | 1.46 | 0.0387 |
| **miR-106b              | 1.44 | 0.0196 |
| **miR-22                | 1.41 | 0.0454 |
| miR-542-3p              | 1.40 | 0.0360 |
| miR-295                 | 1.40 | 0.0314 |
| miR-30b-5p              | 1.38 | 0.0306 |
| miR-411                 | 1.37 | 0.0373 |
| miR-15b                 | 1.36 | 0.0468 |
| miR-191                 | 1.34 | 0.0124 |
| <b>6 Down-regulated</b> |      |        |
| miR-1224                | 0.30 | 0.0498 |
| miR-224                 | 0.44 | 0.0164 |
| miR-434                 | 0.46 | 0.0253 |
| miR-204                 | 0.56 | 0.0361 |
| miR-139-3p              | 0.60 | 0.0485 |
| miR-349                 | 0.63 | 0.0013 |
